# Supplementary material for: Molecular Subtypes Based on DNA Methylation Predict Prognosis in Lung Squamous Cell Carcinoma
Source: Research Square preprint supplement (doi:10.21203/rs.3.rs-80105/v1), 2020-10-15
Supplement: Supplementary file 1 [file 253aae772317784813a60a12.xlsx]

## Sheet: Sheet1
Id	futime	fustat	age	gender	grade	stage	T	M	N
TCGA-68-7755	83	0	60	FEMALE	unknow	Stage IIA	T1b	M0	N1
TCGA-68-7756	202	0	84	MALE	unknow	Stage IIIA	T4	MX	N1
TCGA-68-7757	211	0	74	MALE	unknow	Stage IA	T1b	MX	N0
TCGA-68-8250	244	0	66	MALE	unknow	Stage IA	T1a	MX	N0
TCGA-68-8251	406	0	78	MALE	unknow	Stage IB	T2a	M0	N0
TCGA-68-A59I	492	0	73	FEMALE	unknow	Stage IIIA	T3	M0	N1
TCGA-68-A59J	448	0	74	FEMALE	unknow	Stage IB	T2a	MX	N0
TCGA-6A-AB49		1	73	FEMALE	unknow	Stage IB	T2	MX	N0
TCGA-70-6722	367	0	47	MALE	unknow	Stage IIIA	T3	M0	N1
TCGA-70-6723	375	0	65	MALE	unknow	Stage IIA	T3	M0	N0
TCGA-77-6842	899	1	79	MALE	unknow	Stage IIB	T2	M0	N1
TCGA-77-6843	2224	1	74	MALE	unknow	Stage IIA	T1	M0	N1
TCGA-77-6844	2284	1	74	MALE	unknow	Stage IIIA	T3	M0	N1
TCGA-77-6845	708	1	69	MALE	unknow	Stage IIB	T3	M0	N0
TCGA-77-7138	340	1	67	MALE	unknow	Stage IB	T2	M0	N0
TCGA-77-7139	4261	0	56	MALE	unknow	Stage IIB	T2	M0	N1
TCGA-77-7140	632	1	69	FEMALE	unknow	Stage IIB	T2	M0	N1
TCGA-77-7141	15	0	64	MALE	unknow	Stage IB	T2	M0	N0
TCGA-77-7142	2227	0	59	FEMALE	unknow	Stage IB	T2	M0	N0
TCGA-77-7335	2133	1	62	FEMALE	unknow	Stage IIIB	T4	M0	N2
TCGA-77-7337	3253	1	65	MALE	unknow	Stage IIB	T2	M0	N1
TCGA-77-7338	5	1	64	MALE	unknow	Stage IB	T2	M0	N0
TCGA-77-7463	1423	1	75	MALE	unknow	Stage IB	T2	M0	N0
TCGA-77-7465	990	0	58	MALE	unknow	Stage IIA	T2a	M0	N1
TCGA-77-8007	198	1	68	MALE	unknow	Stage IIB	T2	M0	N1
TCGA-77-8008	2639	1	68	MALE	unknow	Stage IB	T2	M0	N0
TCGA-77-8009	1695	1	68	MALE	unknow	Stage IIB	T2	M0	N1
TCGA-77-8128	1150	1	60	MALE	unknow	Stage IIIA	T2	M0	N2
TCGA-77-8130	4765	0	69	MALE	unknow	Stage IIB	T2	M0	N1
TCGA-77-8131	383	1	72	MALE	unknow	Stage IB	T2	M0	NX
TCGA-77-8133	1640	1	74	MALE	unknow	Stage IIA	T1	M0	N1
TCGA-77-8136	1189	1	74	FEMALE	unknow	Stage IIB	T2	M0	N1
TCGA-77-8138	539	1	74	MALE	unknow	Stage IB	T2	M0	N0
TCGA-77-8139	3166	0	72	MALE	unknow	Stage IIB	T3	M0	N0
TCGA-77-8140	351	1	66	FEMALE	unknow	Stage IIB	T2	M0	N1
TCGA-77-8143	803	1	76	MALE	unknow	Stage IIIA	T2	M0	N2
TCGA-77-8144	833	0	70	MALE	unknow	Stage IB	T2	M0	N0
TCGA-77-8145	212	1	73	MALE	unknow	Stage IIIB	T4	M0	N1
TCGA-77-8146	3189	0	72	MALE	unknow	Stage IA	T1	M0	N0
TCGA-77-8148	2023	0	68	MALE	unknow	Stage IIIA	T3	M0	N1
TCGA-77-8150	1655	1	64	MALE	unknow	Stage IIIA	T3	M0	N1
TCGA-77-8153	1992	0	77	FEMALE	unknow	Stage IB	T2	M0	N0
TCGA-77-8154	1841	0	67	MALE	unknow	Stage IA	T1	M0	N0
TCGA-77-8156	1106	0	60	MALE	unknow	Stage IB	T2a	M0	N0
TCGA-77-A5FZ	3838	1	64	MALE	unknow	Stage IIIB	T4	M0	N0
TCGA-77-A5G1	4026	0	75	MALE	unknow	Stage IIIA	T3	M0	N1
TCGA-77-A5G3	4570	0	63	MALE	unknow	Stage IIB	T2	M0	N1
TCGA-77-A5G6	678	1	66	MALE	unknow	Stage IIIA	T2	M0	N2
TCGA-77-A5G7	180	1	63	MALE	unknow	Stage IA	T1	M0	N0
TCGA-77-A5G8	1884	0	70	MALE	unknow	Stage IIB	T3	M0	N0
TCGA-77-A5GA	1280	0	76	MALE	unknow	Stage IB	T2a	M0	N0
TCGA-77-A5GB	0	1	90	MALE	unknow	Stage IB	T2a	M0	NX
TCGA-77-A5GF	840	1	70	MALE	unknow	Stage IIA	T2a	M0	N1
TCGA-77-A5GH	1182	0	81	MALE	unknow	Stage IB	T2a	M0	N0
TCGA-79-5596		0	unknow	MALE	unknow	Stage IIIA	T3	M0	N1
TCGA-85-6175	294	1	63	FEMALE	unknow	Stage IIB	T3	M0	N0
TCGA-85-6560	1259	0	59	MALE	unknow	Stage IIA	T1b	M0	N1
TCGA-85-6561	1224	0	66	MALE	unknow	Stage IB	T2a	M0	NX
TCGA-85-6798	195	1	57	MALE	unknow	Stage IIIA	T3	M0	N1
TCGA-85-7696	1111	0	64	MALE	unknow	Stage IA	T1	M0	N0
TCGA-85-7697	1063	0	49	MALE	unknow	Stage IIB	T3	M0	N0
TCGA-85-7698	952	0	48	MALE	unknow	Stage IA	T1b	M0	N0
TCGA-85-7699	1001	1	73	MALE	unknow	Stage IIIA	T4	M0	N0
TCGA-85-7710	42	0	59	FEMALE	unknow	Stage IA	T1b	M0	N0
TCGA-85-7843	35	0	50	MALE	unknow	Stage IIA	T2a	M0	N1
TCGA-85-7844	911	0	71	MALE	unknow	Stage IB	T2a	M0	N0
TCGA-85-7950	576	0	46	MALE	unknow	Stage IB	T2a	M0	N0
TCGA-85-8048	765	0	62	MALE	unknow	Stage IA	T1	M0	N0
TCGA-85-8049	579	0	57	MALE	unknow	Stage IB	T2a	M0	N0
TCGA-85-8052	734	0	53	MALE	unknow	Stage IIB	T3	M0	N0
TCGA-85-8070	960	0	71	MALE	unknow	Stage IB	T2	M0	N0
TCGA-85-8071	815	0	52	MALE	unknow	Stage IIA	T1a	M0	N1
TCGA-85-8072	932	0	60	MALE	unknow	Stage IA	T1a	M0	N0
TCGA-85-8276	1050	0	62	MALE	unknow	Stage IIA	T1b	M0	N1
TCGA-85-8277	307	1	70	MALE	unknow	Stage IIIA	T3	M0	N1
TCGA-85-8287	23	1	72	MALE	unknow	Stage IA	T1b	M0	N0
TCGA-85-8288	402	1	70	MALE	unknow	Stage IIA	T1b	M0	N1
TCGA-85-8350	683	0	61	MALE	unknow	Stage IA	T1b	M0	N0
TCGA-85-8351	510	0	72	MALE	unknow	Stage IIA	T2a	M0	N1
TCGA-85-8352	161	1	67	MALE	unknow	Stage IIIA	T3	M0	N1
TCGA-85-8353	94	1	72	MALE	unknow	Stage IIIA	T3	M0	N1
TCGA-85-8354	995	0	53	MALE	unknow	Stage IB	T2a	M0	N0
TCGA-85-8355	61	0	63	MALE	unknow	Stage IA	T1a	M0	N0
TCGA-85-8479	468	0	66	MALE	unknow	Stage IA	T1a	M0	N0
TCGA-85-8481	236	1	70	MALE	unknow	Stage IIB	T3	M0	N0
TCGA-85-8580	1113	0	52	FEMALE	unknow	Stage IB	T2a	M0	N0
TCGA-85-8582	1160	0	49	MALE	unknow	Stage IA	T1a	M0	N0
TCGA-85-8584	383	1	71	MALE	unknow	Stage IIA	T2a	M0	N1
TCGA-85-8664	550	1	73	MALE	unknow	Stage IIB	T2b	M0	N1
TCGA-85-8666	687	1	65	MALE	unknow	Stage IB	T2a	M0	N0
TCGA-85-A4CL	921	1	65	MALE	unknow	Stage IA	T1b	M0	N0
TCGA-85-A4CN	1038	0	56	FEMALE	unknow	Stage IIB	T2b	M0	N1
TCGA-85-A4JB	942	0	74	MALE	unknow	Stage IIB	T3	M0	N0
TCGA-85-A4JC	604	1	84	MALE	unknow	Stage IIA	T2b	M0	N0
TCGA-85-A4PA	741	0	61	MALE	unknow	Stage IB	T2a	M0	N0
TCGA-85-A4QQ	927	1	68	MALE	unknow	Stage IB	T2a	M0	N0
TCGA-85-A4QR	600	0	67	MALE	unknow	Stage IB	T2a	M0	N0
TCGA-85-A50M	826	1	47	MALE	unknow	Stage IIA	T2b	M0	N0
TCGA-85-A50Z	493	0	57	MALE	unknow	Stage IIA	T2b	M0	N0
TCGA-85-A510	482	0	74	FEMALE	unknow	Stage IIB	T2b	M0	N1
TCGA-85-A511	455	1	62	MALE	unknow	Stage IIB	T2b	M0	N1
TCGA-85-A512	465	0	46	MALE	unknow	Stage IIA	T1b	M0	N1
TCGA-85-A513	910	0	60	FEMALE	unknow	Stage IA	T1a	M0	NX
TCGA-85-A53L	377	0	63	MALE	unknow	Stage IIA	T2b	M0	N0
TCGA-85-A5B5	111	0	58	MALE	unknow	Stage IA	T1b	M0	N0
TCGA-90-6837	758	0	64	MALE	unknow	Stage IIB	T3	MX	N0
TCGA-90-7766	289	0	66	FEMALE	unknow	Stage IA	T1b	MX	N0
TCGA-90-7767	89	0	56	MALE	unknow	Stage IIB	T2b	MX	N1
TCGA-90-7769	358	0	55	MALE	unknow	Stage IIB	T2b	MX	N1
TCGA-90-7964	428	0	70	MALE	unknow	Stage IB	T2a	MX	N0
TCGA-90-A4ED	615	0	69	MALE	unknow	Stage IB	T2a	MX	N0
TCGA-90-A4EE	688	0	53	MALE	unknow	Stage IIA	T2a	MX	N1
TCGA-90-A59Q	322	1	61	FEMALE	unknow	Stage IIA	T2a	MX	N1
TCGA-92-7340	82	0	45	FEMALE	unknow	Stage IIA	T2a	MX	N1
TCGA-92-7341	106	0	71	MALE	unknow	Stage IB	T2a	MX	N0
TCGA-92-8063	122	0	52	MALE	unknow	Stage IIIA	T2b	MX	N2
TCGA-92-8064	160	0	58	MALE	unknow	unknow	T2b	MX	N0
TCGA-92-8065	70	0	74	FEMALE	unknow	Stage IIB	T3	MX	N0
TCGA-94-7033	640	0	73	MALE	unknow	Stage IB	T2	MX	N0
TCGA-94-7557	5	1	73	MALE	unknow	Stage IB	T2	M0	N0
TCGA-94-7943	559	0	80	MALE	unknow	Stage IA	T1b	MX	NX
TCGA-94-8035	122	0	64	MALE	unknow	Stage IIB	T3	MX	N0
TCGA-94-8490	153	0	70	MALE	unknow	Stage IIB	T3	M0	N0
TCGA-94-8491	810	0	73	MALE	unknow	Stage IIA	T2a	M0	N1
TCGA-94-A4VJ	430	0	71	FEMALE	unknow	Stage IA	T1b	M0	N0
TCGA-94-A5I4	491	0	61	MALE	unknow	Stage IIA	T2a	MX	N1
TCGA-94-A5I6	538	0	62	MALE	unknow	Stage IIB	T3	M0	N0
TCGA-96-7544	2160	1	83	MALE	unknow	Stage IIB	T2	MX	N1
TCGA-96-7545	1736	1	73	MALE	unknow	Stage IA	T1	MX	N0
TCGA-96-8169	557	0	67	FEMALE	unknow	Stage IA	T1a	M0	N0
TCGA-96-8170	531	0	75	FEMALE	unknow	Stage IIA	T1a	M0	N1
TCGA-96-A4JK	589	0	65	MALE	unknow	Stage IIA	T2a	M0	N1
TCGA-96-A4JL	842	0	78	FEMALE	unknow	Stage IIA	T2a	M0	N1
TCGA-98-7454	652	0	73	MALE	unknow	Stage IB	T2a	M0	N0
TCGA-98-8020	84	1	56	FEMALE	unknow	Stage IIIA	T2	M0	N2
TCGA-98-8021	937	0	75	FEMALE	unknow	Stage IA	T1a	M0	N0
TCGA-98-8022	933	1	61	MALE	unknow	Stage IA	T1a	M0	N0
TCGA-98-8023	649	0	70	MALE	unknow	Stage IIIA	T3	M0	N1
TCGA-98-A538	826	0	67	MALE	unknow	Stage IIB	T3	M0	N0
TCGA-98-A539	173	0	63	MALE	unknow	Stage IIB	T3	M0	N0
TCGA-98-A53A	552	1	70	MALE	unknow	Stage IB	T2a	M0	N0
TCGA-98-A53B	61	1	69	MALE	unknow	Stage IB	T2a	M0	N0
TCGA-98-A53C	822	0	77	FEMALE	unknow	Stage IA	T1a	M0	N0
TCGA-98-A53D	645	1	68	MALE	unknow	Stage IIB	T3	M0	N0
TCGA-98-A53H	618	0	76	FEMALE	unknow	Stage IA	T1a	M0	N0
TCGA-98-A53I	565	0	64	MALE	unknow	Stage IIA	T2a	M0	N1
TCGA-98-A53J	630	0	77	MALE	unknow	Stage IB	T2a	M0	N0
TCGA-J1-A4AH	581	0	70	MALE	unknow	Stage IIA	T2b	MX	N0
TCGA-L3-A4E7	392	0	71	MALE	unknow	Stage IB	T2a	M0	N0
TCGA-L3-A524	490	1	45	FEMALE	unknow	Stage IIB	T3	M0	N0
TCGA-LA-A446	401	0	68	MALE	unknow	Stage IA	T1b	MX	N0
TCGA-LA-A7SW	408	1	71	MALE	unknow	Stage IIIA	T3	MX	N1
TCGA-MF-A522	360	1	54	MALE	unknow	Stage IB	T2a	MX	N0
TCGA-NC-A5HD	2	1	79	MALE	unknow	Stage IIB	T3	M0	N0
TCGA-NC-A5HE	2336	0	60	MALE	unknow	Stage IIB	T2	M0	N1
TCGA-NC-A5HF	138	1	74	MALE	unknow	Stage IIIB	T4	MX	N0
TCGA-NC-A5HG	1963	0	59	MALE	unknow	Stage IIIA	T2	M0	N2
TCGA-NC-A5HH	37	0	53	MALE	unknow	Stage IA	T1	M0	N0
TCGA-NC-A5HI	1743	0	68	FEMALE	unknow	Stage IB	T2	M0	N0
TCGA-NC-A5HJ	418	1	59	MALE	unknow	Stage IIB	T3	M0	N0
TCGA-NC-A5HK	128	0	58	FEMALE	unknow	Stage IIB	T3	M0	N0
TCGA-NC-A5HL	88	1	73	MALE	unknow	Stage IIA	T2b	M0	N0
TCGA-NC-A5HM	1212	0	76	MALE	unknow	Stage IB	T2a	M0	N0
TCGA-NC-A5HN	1499	0	77	MALE	unknow	Stage IIA	T2a	M0	N1
TCGA-NC-A5HO	1336	0	70	FEMALE	unknow	Stage IIIA	T3	M0	N1
TCGA-NC-A5HP	770	1	69	MALE	unknow	Stage IV	T2a	M1b	N0
TCGA-NC-A5HQ	448	1	70	MALE	unknow	Stage IIIA	T3	M0	N2
TCGA-NC-A5HR	1244	0	75	FEMALE	unknow	Stage IIA	T2a	M0	N1
TCGA-NC-A5HT	804	0	69	MALE	unknow	Stage IIIA	T3	M0	N1
TCGA-NK-A5CR	2542	0	77	MALE	unknow	Stage IB	T2	MX	N0
TCGA-NK-A5CT	1997	0	70	MALE	unknow	Stage IA	T1	M0	N0
TCGA-NK-A5CX	111	0	73	MALE	unknow	Stage IIA	T2b	MX	N0
TCGA-NK-A5D1	511	0	57	MALE	unknow	Stage IIA	T2a	M0	N1
TCGA-NK-A7XE	13	0	66	MALE	unknow	Stage IIIB	T4	M0	N2
TCGA-O2-A52N	1006	1	78	MALE	unknow	Stage I	T2	MX	N0
TCGA-O2-A52Q	113	1	44	FEMALE	unknow	Stage III	T3	MX	N1
TCGA-O2-A52S	387	1	57	FEMALE	unknow	Stage III	T4	MX	N2
TCGA-O2-A52V	1335	1	75	FEMALE	unknow	Stage II	T3	MX	N0
TCGA-O2-A52W	261	1	63	MALE	unknow	Stage I	T2	MX	N0
TCGA-O2-A5IB	340	1	71	FEMALE	unknow	Stage III	T3	MX	N1
TCGA-XC-AA0X	6	1	77	FEMALE	unknow	Stage IA	T1a	M0	N0
TCGA-63-5128		1	unknow	MALE	unknow	Stage IB	T2	M0	N0
TCGA-63-5131		1	unknow	MALE	unknow	Stage IIB	T2	M0	N1
TCGA-63-6202	1602	0	unknow	MALE	unknow	Stage IIA	T2	M0	N0
TCGA-63-7020	2133	0	unknow	MALE	unknow	Stage IA	T1	M0	N0
TCGA-63-7021	2142	0	unknow	MALE	unknow	Stage IA	T1	M0	N0
TCGA-63-7022	2073	0	unknow	FEMALE	unknow	Stage IA	T1	M0	N0
TCGA-63-7023	1682	0	unknow	MALE	unknow	Stage IIA	T1	M0	N1
TCGA-63-A5M9	0	0	unknow	FEMALE	unknow	Stage IIB	T2	M0	N1
TCGA-63-A5MB	3123	0	62	MALE	unknow	Stage IB	T2	M0	N0
TCGA-63-A5MG	2148	0	68	MALE	unknow	Stage IB	T2	M0	N0
TCGA-63-A5MH	2026	0	68	MALE	unknow	Stage IA	T1	M0	N0
TCGA-63-A5MI	1784	0	65	MALE	unknow	Stage IIIA	T2	M0	N2
TCGA-63-A5MJ	1824	0	54	MALE	unknow	Stage IIB	T2	M0	N1
TCGA-63-A5ML	1386	0	68	MALE	unknow	Stage IB	T2	M0	N0
TCGA-63-A5MM	456	1	69	FEMALE	unknow	Stage IIB	T2	M0	N1
TCGA-63-A5MN	345	1	78	FEMALE	unknow	Stage IIB	T3	M0	N0
TCGA-63-A5MP	769	0	56	MALE	unknow	Stage IIB	T2	M0	N1
TCGA-63-A5MR	2716	0	70	FEMALE	unknow	Stage IB	T2	M0	N0
TCGA-63-A5MS	2381	0	78	MALE	unknow	Stage IB	T2	M0	N0
TCGA-63-A5MT	498	0	74	MALE	unknow	Stage IIB	T3	M0	N0
TCGA-63-A5MU		1	48	MALE	unknow	Stage IIB	T2b	M0	N1
TCGA-63-A5MV	1100	0	69	MALE	unknow	Stage IIA	T2b	M0	N0
TCGA-63-A5MW	1639	0	76	MALE	unknow	Stage IB	T2	M0	N0
TCGA-63-A5MY	1052	0	63	MALE	unknow	Stage IA	T1b	M0	N0
TCGA-56-5897	378	0	74	MALE	unknow	Stage IA	T1b	MX	N0
TCGA-56-5898	555	0	69	MALE	unknow	Stage IA	T1b	M0	N0
TCGA-56-6545	666	0	77	FEMALE	unknow	Stage IB	T2a	M0	N0
TCGA-56-6546		0	67	MALE	unknow	Stage IIA	T2b	MX	N0
TCGA-56-7221	608	0	79	MALE	unknow	Stage IB	T2	M0	N0
TCGA-56-7222	562	1	60	MALE	unknow	Stage IB	T2a	M0	N0
TCGA-56-7223	442	1	66	MALE	unknow	Stage IIIA	T3	MX	N1
TCGA-56-7579	951	1	61	MALE	unknow	Stage IIIA	T3	M0	N1
TCGA-56-7580	925	0	84	MALE	unknow	Stage IB	T2a	M0	N0
TCGA-56-7582	601	0	83	MALE	unknow	Stage IB	T2a	M0	N0
TCGA-56-7730	198	1	73	MALE	unknow	Stage IIA	T2b	M0	N0
TCGA-56-7731	3	1	66	FEMALE	unknow	Stage IB	T2a	MX	N0
TCGA-56-7822	532	1	75	MALE	unknow	Stage IIB	T2b	M0	N1
TCGA-56-7823	1011	0	58	FEMALE	unknow	Stage IIA	T1b	M0	N1
TCGA-56-8082	455	0	80	FEMALE	unknow	Stage IIA	T2b	MX	N0
TCGA-56-8083	150	0	56	MALE	unknow	Stage IB	T2a	MX	N0
TCGA-56-8201	397	1	74	MALE	unknow	Stage IIB	T3	MX	N0
TCGA-56-8304	106	0	73	FEMALE	unknow	Stage IA	T1b	MX	N0
TCGA-56-8305	105	0	72	MALE	unknow	Stage IB	T2a	M0	N0
TCGA-56-8307	818	0	55	FEMALE	unknow	Stage IIB	T3	M0	N0
TCGA-56-8308	517	0	79	MALE	unknow	Stage IIB	T3	MX	N0
TCGA-56-8309	428	0	66	MALE	unknow	Stage IA	T1b	MX	N0
TCGA-56-8503	41	0	76	FEMALE	unknow	Stage IIB	T3	M0	N0
TCGA-56-8504	510	0	74	MALE	unknow	Stage IB	T2a	MX	N0
TCGA-56-8622	55	0	68	MALE	unknow	Stage IB	T2a	M0	N0
TCGA-56-8623	692	1	71	MALE	unknow	Stage IB	T2a	MX	N0
TCGA-56-8624	420	0	84	MALE	unknow	Stage IIB	T3	MX	N0
TCGA-56-8625	315	1	66	FEMALE	unknow	Stage IIIA	T3	MX	N1
TCGA-56-8626	302	1	59	MALE	unknow	Stage IA	T1a	MX	N0
TCGA-56-8628	616	0	78	MALE	unknow	Stage IA	T1b	MX	N0
TCGA-56-8629	481	0	63	MALE	unknow	Stage IIA	T2b	MX	N0
TCGA-56-A49D	637	0	67	MALE	unknow	Stage IIIA	T2a	MX	N2
TCGA-56-A4BW	585	0	55	MALE	unknow	Stage IIA	T2a	M0	N1
TCGA-56-A4BX	405	0	70	MALE	unknow	Stage IIA	T2b	MX	N0
TCGA-56-A4BY	543	1	66	MALE	unknow	Stage IB	T2a	MX	N0
TCGA-56-A4ZJ	640	0	75	FEMALE	unknow	Stage IA	T1a	M0	N0
TCGA-56-A4ZK	570	0	76	FEMALE	unknow	Stage IB	T2	M0	N0
TCGA-56-A5DR	4	0	81	MALE	unknow	Stage IA	T1a	MX	N0
TCGA-56-A5DS	8	0	72	FEMALE	unknow	Stage IB	T2a	MX	N0
TCGA-56-A62T	440	0	78	MALE	unknow	Stage IIA	T2b	MX	N0
TCGA-58-8386	1	1	75	MALE	unknow	Stage IV	T3	M1	NX
TCGA-58-8387	403	1	60	MALE	unknow	Stage IIA	T2b	M0	N0
TCGA-58-8388	412	1	60	MALE	unknow	Stage IB	T2a	M0	N0
TCGA-58-8390	911	0	70	MALE	unknow	Stage IIA	T2b	M0	N0
TCGA-58-8391	2167	0	57	FEMALE	unknow	Stage IIIA	T2	M0	N2
TCGA-58-8392	501	1	70	MALE	unknow	Stage IB	T2a	M0	N0
TCGA-58-8393	1058	0	68	FEMALE	unknow	Stage IB	T2a	M0	N0
TCGA-58-A46J	2589	0	64	MALE	unknow	Stage IIB	T2	M0	N1
TCGA-58-A46K	1045	1	59	MALE	unknow	Stage IIIA	T2	M0	N2
TCGA-58-A46L	1723	0	73	MALE	unknow	Stage IIIA	T2	M0	N2
TCGA-58-A46M	1072	0	61	MALE	unknow	Stage IIB	T2b	M0	N1
TCGA-58-A46N	910	0	52	MALE	unknow	Stage IB	T2a	M0	N0
TCGA-51-6867	1856	1	72	FEMALE	unknow	Stage I	T1	M0	N0
TCGA-52-7622	862	0	62	FEMALE	unknow	Stage IA	T1a	M0	N0
TCGA-52-7809	166	1	74	MALE	unknow	Stage IB	T2	M0	N0
TCGA-52-7810	923	0	60	FEMALE	unknow	Stage IIB	T3	M0	N0
TCGA-52-7811	266	1	67	MALE	unknow	Stage IB	T2	M0	N0
TCGA-52-7812	835	1	68	MALE	unknow	unknow	T2	M0	N2
TCGA-46-6025	324	0	71	MALE	unknow	Stage IIB	T2b	M0	N1
TCGA-46-6026	423	0	81	MALE	unknow	Stage IIB	T2a	M0	N1
TCGA-51-4079	12	1	73	FEMALE	unknow	Stage IB	T2	unknow	N0
TCGA-51-4080	12	1	65	MALE	unknow	Stage IIIB	T4	unknow	N1
TCGA-43-5668	559	1	78	MALE	unknow	Stage IIA	T1b	M0	N1
TCGA-43-5670	849	0	70	MALE	unknow	Stage IIA	T2b	M0	N0
TCGA-43-6143	699	0	70	MALE	unknow	Stage IB	T2	M0	N0
TCGA-43-6647	757	0	69	FEMALE	unknow	Stage IIB	T2b	MX	N1
TCGA-43-6770	653	0	59	FEMALE	unknow	Stage IB	T2a	MX	N0
TCGA-43-6771	166	1	85	MALE	unknow	Stage IB	T2	MX	N0
TCGA-43-6773	116	1	76	MALE	unknow	Stage IIB	T2	MX	N1
TCGA-43-7656	596	0	71	MALE	unknow	Stage IA	T1b	MX	N0
TCGA-43-7657	236	0	68	FEMALE	unknow	Stage IA	T1	MX	N0
TCGA-43-7658	2378	1	75	FEMALE	unknow	Stage IA	T1	M0	N0
TCGA-43-8115	407	0	72	FEMALE	unknow	Stage IIA	T2a	MX	N1
TCGA-43-8116	358	0	73	MALE	unknow	Stage IA	T1b	M0	N0
TCGA-43-8118	89	1	55	FEMALE	unknow	Stage IA	T1b	M0	N0
TCGA-43-A474	353	0	66	MALE	unknow	Stage IIA	T2b	M0	N0
TCGA-43-A475	296	0	67	FEMALE	unknow	Stage IIB	T3	M0	N0
TCGA-43-A56U	432	0	76	FEMALE	unknow	Stage IA	T1b	MX	N0
TCGA-43-A56V	366	0	61	MALE	unknow	Stage IIIA	T2a	M0	N2
TCGA-18-3417	1097	1	65	MALE	unknow	Stage IV	T2	M1	N1
TCGA-18-4721	4694	0	74	MALE	unknow	Stage IA	T1	M0	N0
TCGA-18-5592	1519	0	57	MALE	unknow	Stage IIB	T3	M0	N0
TCGA-18-5595	827	1	50	MALE	unknow	Stage IB	T2	M0	N0
TCGA-21-5782	962	1	68	FEMALE	unknow	Stage IB	T2	M0	N0
TCGA-21-5783	2680	1	76	MALE	unknow	Stage IB	T2	M0	N0
TCGA-21-5784	1268	0	80	FEMALE	unknow	Stage IB	T2	M0	N0
TCGA-21-5786	1032	0	64	MALE	unknow	Stage IB	T2	M0	N0
TCGA-21-5787	329	1	65	MALE	unknow	Stage IIIA	T2	M0	N2
TCGA-21-A5DI	979	0	77	MALE	unknow	Stage IA	T1b	M0	N0
TCGA-22-4593	1067	1	77	MALE	unknow	Stage IIA	T2b	M0	N0
TCGA-22-4596	17	1	69	FEMALE	unknow	Stage IB	T1b	M0	N0
TCGA-22-4599	1161	1	73	FEMALE	unknow	Stage IB	T2a	M0	N0
TCGA-22-4601	1057	1	73	FEMALE	unknow	Stage IIIA	T4	M0	N0
TCGA-22-4605	974	1	78	FEMALE	unknow	Stage IB	T2	M0	N0
TCGA-22-4609	291	1	81	MALE	unknow	Stage IA	T1	M0	N0
TCGA-22-4613	358	1	73	FEMALE	unknow	Stage IA	T1b	M0	N0
TCGA-22-5471	1845	0	75	MALE	unknow	Stage IB	T2	M0	N0
TCGA-22-5472	1975	1	67	MALE	unknow	Stage IB	T2a	M0	N0
TCGA-22-5473	1933	1	78	MALE	unknow	unknow	T3	M0	N0
TCGA-22-5474	445	1	74	MALE	unknow	Stage IB	T2a	M0	N0
TCGA-22-5477	1346	1	65	MALE	unknow	Stage IA	T1	M0	N0
TCGA-22-5478	24	1	79	MALE	unknow	Stage IB	T2a	M0	N0
TCGA-22-5479	2625	1	64	MALE	unknow	Stage IB	T2	M0	N0
TCGA-22-5480	2170	1	66	FEMALE	unknow	Stage IA	T1b	M0	N0
TCGA-22-5481	2409	1	72	FEMALE	unknow	Stage IIB	T2	M0	N1
TCGA-22-5482	357	1	81	MALE	unknow	Stage IB	T2a	M0	N0
TCGA-22-5483	573	1	74	MALE	unknow	Stage IIA	T1a	M0	N1
TCGA-22-5485	916	1	58	FEMALE	unknow	Stage IA	T1a	M0	N0
TCGA-22-5489	1912	1	64	MALE	unknow	Stage IA	T1b	M0	N0
TCGA-22-5491	1713	1	74	MALE	unknow	Stage IA	T1a	M0	N0
TCGA-22-5492	506	1	73	FEMALE	unknow	Stage IIIA	T2a	M0	N2
TCGA-22-A5C4	671	0	70	MALE	unknow	Stage IIA	T2b	M0	N0
TCGA-33-4566	5287	1	40	MALE	unknow	Stage IB	T2	M0	N0
TCGA-33-4582	3149	1	55	MALE	unknow	Stage IA	T1	M0	N0
TCGA-33-4583	4601	1	73	MALE	unknow	Stage IA	T1	M0	N0
TCGA-33-4586	428	1	57	MALE	unknow	Stage IIIA	T2	M0	N2
TCGA-33-4587	1656	1	63	FEMALE	unknow	Stage IB	T2	MX	N0
TCGA-33-4589	47	1	62	FEMALE	unknow	Stage IIB	T2	M0	N1
TCGA-33-6737	601	1	71	MALE	unknow	Stage IIIA	T2	M0	N2
TCGA-33-6738	1927	0	80	MALE	unknow	Stage IIIA	T1	MX	N2
TCGA-33-A4WN	143	1	60	MALE	unknow	Stage IB	T2a	MX	N0
TCGA-33-A5GW	9	0	67	MALE	unknow	Stage IIA	T1a	MX	N1
TCGA-33-AAS8	1114	1	59	FEMALE	unknow	Stage IA	T1	MX	N0
TCGA-33-AASB	211	1	66	MALE	unknow	Stage IB	T2	MX	N0
TCGA-33-AASD	2249	1	83	MALE	unknow	Stage IA	T1	MX	N0
TCGA-33-AASI	1344	1	65	FEMALE	unknow	Stage IIB	T2	MX	N1
TCGA-33-AASJ	3600	1	60	MALE	unknow	Stage IB	T2	MX	N0
TCGA-33-AASL	826	1	57	FEMALE	unknow	Stage IA	T1	MX	N0
TCGA-34-5231	1984	1	72	MALE	unknow	Stage IA	T1	M0	N0
TCGA-34-5232	2471	0	75	FEMALE	unknow	Stage IIA	T1	M0	N1
TCGA-34-5234	2271	0	71	FEMALE	unknow	Stage IA	T1	M0	N0
TCGA-34-5236	276	1	60	MALE	unknow	Stage IIB	T3	M0	N0
TCGA-34-5239	1834	0	75	MALE	unknow	Stage IIIA	T4	M0	N0
TCGA-34-5240	1541	0	73	FEMALE	unknow	Stage IIB	T2	M0	N1
TCGA-34-5241	515	1	79	MALE	unknow	Stage IB	T2	M0	N0
TCGA-34-5927	1361	0	70	FEMALE	unknow	Stage IA	T1	M0	N0
TCGA-34-5928	1196	0	83	FEMALE	unknow	Stage IIB	T2	M0	N1
TCGA-34-5929	151	1	78	FEMALE	unknow	Stage IB	T2	M0	N0
TCGA-34-7107	34	1	70	MALE	unknow	Stage II	T2a	M0	N0
TCGA-34-8454	1180	0	62	FEMALE	unknow	Stage IIIA	T3	M0	N1
TCGA-34-8455	123	1	67	MALE	unknow	Stage IV	T4	M1a	N0
TCGA-34-8456	804	0	71	FEMALE	unknow	Stage IIA	T2a	M0	N1
TCGA-34-A5IX	1031	0	80	MALE	unknow	Stage IIB	T3	M0	N0
TCGA-37-3789	13	0	65	MALE	unknow	Stage IB	T2	unknow	N0
TCGA-37-3792	12	0	69	MALE	unknow	Stage IB	T2	M0	N0
TCGA-37-4141	12	0	65	FEMALE	unknow	Stage IA	T1b	M0	N0
TCGA-37-5819	103	0	64	MALE	unknow	Stage IIIA	T2	M0	N2
TCGA-37-A5EL	1143	1	53	MALE	unknow	Stage IIB	T3	M0	N0
TCGA-37-A5EM	867	0	49	MALE	unknow	Stage II	T2	M0	N0
TCGA-37-A5EN	660	0	59	MALE	unknow	Stage IIIB	T4	M0	N2
TCGA-39-5011	4053	0	70	FEMALE	unknow	Stage IA	T1b	M0	N0
TCGA-39-5016	3850	0	44	MALE	unknow	Stage IIA	T2a	M0	N1
TCGA-39-5019	3387	0	70	MALE	unknow	Stage IB	T2a	M0	N0
TCGA-39-5021	2086	1	70	MALE	unknow	Stage IB	T2a	M0	N0
TCGA-39-5022	1679	1	76	MALE	unknow	Stage IB	T2a	M0	N0
TCGA-39-5024	2510	0	65	FEMALE	unknow	Stage IIIA	T2a	M0	N2
TCGA-39-5027	3108	0	73	MALE	unknow	Stage IB	T2a	M0	N0
TCGA-39-5028	52	1	75	MALE	unknow	Stage IIIA	T4	M0	N1
TCGA-39-5029	740	1	67	MALE	unknow	Stage IIIA	T1b	M0	N2
TCGA-39-5030	59	1	81	FEMALE	unknow	Stage IIIA	T2a	M0	N2
TCGA-39-5031	1841	1	76	FEMALE	unknow	Stage IA	T1a	M0	N0
TCGA-39-5034	1107	1	73	FEMALE	unknow	Stage IIB	T3	M0	N0
TCGA-39-5035	2080	0	72	FEMALE	unknow	Stage IA	T1b	M0	N0
TCGA-39-5036	2165	0	73	MALE	unknow	Stage IB	T2	M0	N0
TCGA-39-5037	1690	0	65	MALE	unknow	Stage IIA	T1b	M0	N1
TCGA-39-5039	544	1	76	MALE	unknow	Stage IIA	T2b	M0	N0
TCGA-39-5040	519	1	59	MALE	unknow	Stage IIIA	T2a	M0	N2
TCGA-43-2576	1223	0	62	FEMALE	unknow	Stage IIIA	T2	M0	N2
TCGA-60-2697	372	1	41	MALE	unknow	Stage IIA	T2	M0	N2
TCGA-60-2703	2945	1	73	MALE	unknow	Stage IIB	T2	M0	N1
TCGA-60-2704	1154	1	73	MALE	unknow	Stage IIB	T2	M0	N1
TCGA-60-2709	1505	0	69	MALE	unknow	Stage IB	T2	MX	N0
TCGA-66-2755	28	0	63	MALE	unknow	Stage IB	T2	M0	N0
